# Supplementary material for: The Link between Sleep Insufficiency and Self-Injury among In-School Adolescents: Findings from a Cross-Sectional Survey of Multi-Type Schools in Huangpu District of Shanghai, China
Source: MDPI journal article supplement (doi:10.3390/ijerph192315595), 2022-11-24
Supplement: s1 [file s1]

**Supplementary Table S1.** Correlation of Self-injury and sleep insufficiency among male and female students using multivariate logistic regression with the standard error of school type clustered.

|                                | Male |            |          | Female |           |          |
|--------------------------------|------|------------|----------|--------|-----------|----------|
|                                | AOR  | 95% CI     | <i>p</i> | AOR    | 95% CI    | <i>p</i> |
| Sleep insufficiency            | 0.79 | 0.51–1.23  | 0.295    | 1.73   | 1.28–2.34 | <0.001   |
| School type<br>(Key school)    |      |            |          |        |           |          |
| Ordinary school                | 3.19 | 0.51–19.87 | 0.214    | 0.93   | 0.32–2.67 | 0.893    |
| Vocational school              | 1.07 | 1.01–1.15  | 0.034    | 1.38   | 1.09–1.74 | 0.008    |
| Age                            | 1.03 | 0.59–1.80  | 0.919    | 0.85   | 0.59–1.21 | 0.362    |
| Ethnicity (Han)                |      |            |          |        |           |          |
| Minority                       | -    | -          | -        | 0.15   | 0.07–0.33 | <0.001   |
| Living with both parents       |      |            |          |        |           |          |
| Yes                            | 0.83 | 0.32–2.13  | 0.691    | 1.04   | 0.43–2.53 | 0.926    |
| School performance             |      |            |          |        |           |          |
| Average vs. worse off          | 0.69 | 0.24–1.99  | 0.491    | 0.26   | 0.07–0.89 | 0.032    |
| Better off vs. worse off       | 0.39 | 0.20–0.76  | 0.006    | 0.86   | 0.73–1.00 | 0.056    |
| Self-rated weight<br>(Average) |      |            |          |        |           |          |
| Lower than average             | 1.28 | 0.71–2.28  | 0.409    | 0.86   | 0.25–2.95 | 0.807    |
| Higher than average            | 0.75 | 0.33–1.73  | 0.504    | 1.60   | 0.79–3.25 | 0.190    |
| Smoking                        |      |            |          |        |           |          |
| Yes                            | 2.96 | 2.50–3.50  | <0.001   | 1.23   | 0.83–1.81 | 0.307    |
| Drinking                       |      |            |          |        |           |          |
| Yes                            | 1.02 | 0.84–1.24  | 0.822    | 1.68   | 0.78–3.61 | 0.184    |
| Physical active                |      |            |          |        |           |          |
| Yes                            | 1.51 | 0.51–4.49  | 0.457    | 1.13   | 0.77–1.66 | 0.537    |
| Playing video game             |      |            |          |        |           |          |
| Over 4 hours                   | 0.84 | 0.33–2.10  | 0.702    | 0.78   | 0.58–1.05 | 0.098    |
| Bully Experience               |      |            |          |        |           |          |
| Moderate vs. None              | 2.32 | 1.88–2.87  | <0.001   | 2.55   | 1.07–6.08 | 0.035    |
| Severe vs. None                | 3.41 | 1.21–9.58  | 0.020    | 2.66   | 1.00–7.07 | 0.049    |
| Mental Problem                 |      |            |          |        |           |          |
| Moderate vs. Light             | 1.87 | 0.58–5.97  | 0.292    | 1.63   | 0.76–3.49 | 0.206    |
| Severe vs. Light               | 4.19 | 2.67–6.57  | <0.001   | 3.15   | 1.23–8.06 | 0.017    |

Note: No significant interactions between school types and sleep insufficiency were detected.

**Supplementary Table S2.** Correlation of Self-injury and sleep insufficiency (using 7 h as cut-off point) among male and female students using multivariate logistic regression with the standard error of school type clustered.

|                                                | Total |           |          | Male |            |          | Female |           |          |
|------------------------------------------------|-------|-----------|----------|------|------------|----------|--------|-----------|----------|
|                                                | AOR   | 95% CI    | <i>p</i> | AOR  | 95% CI     | <i>p</i> | AOR    | 95% CI    | <i>p</i> |
| Sleep insufficiency                            | 1.51  | 1.44–1.57 | <0.001   | 2.11 | 1.88–2.38  | <0.001   | 1.22   | 1.01–1.47 | 0.041    |
| Sex                                            | 1.55  | 1.06–2.28 | 0.024    | -    | -          | -        | -      | -         | -        |
| School type<br>(Key school)                    |       |           |          |      |            |          |        |           |          |
| Ordinary school                                | 1.10  | 0.54–2.24 | 0.786    | 2.89 | 0.59–14.18 | 0.191    | 0.45   | 0.07–2.75 | 0.390    |
| Vocational school                              | 1.42  | 1.26–1.60 | <0.001   | 1.29 | 1.00–1.67  | 0.054    | 1.59   | 1.27–1.99 | <0.001   |
| <i>Interactions</i>                            |       |           |          |      |            |          |        |           |          |
| <i>Ordinary school * Sleep insufficiency</i>   | 3.30  | 2.59–4.22 | <0.001   | 2.34 | 2.08–2.63  | <0.001   | 3.61   | 1.93–6.75 | <0.001   |
| <i>Vocational school * Sleep insufficiency</i> | 0.84  | 0.80–0.89 | <0.001   | 1.00 | 0.77–1.31  | 0.999    | 0.63   | 0.54–0.75 | <0.001   |
| Age                                            | 0.87  | 0.68–1.11 | 0.258    | 0.97 | 0.57–1.64  | 0.898    | 0.79   | 0.51–1.23 | 0.305    |
| Ethnicity (Han)                                |       |           |          |      |            |          |        |           |          |
| Minority                                       | 0.91  | 0.32–2.60 | 0.856    | -    | -          | -        | 0.26   | 0.07–1.03 | 0.054    |
| Living with both parents                       |       |           |          |      |            |          |        |           |          |
| Yes                                            | 0.90  | 0.66–1.21 | 0.476    | 0.91 | 0.37–2.22  | 0.835    | 0.95   | 0.44–2.04 | 0.899    |
| School performance                             |       |           |          |      |            |          |        |           |          |
| Average vs. worse off                          | 0.47  | 0.41–0.53 | <0.001   | 0.74 | 0.25–2.21  | 0.586    | 0.29   | 0.09–0.92 | 0.035    |
| Better off vs. worse off                       | 0.75  | 0.68–0.82 | <0.001   | 0.48 | 0.30–0.76  | 0.002    | 0.99   | 0.78–1.27 | 0.981    |
| Self-rated weight (Average)                    |       |           |          |      |            |          |        |           |          |
| Lower than average                             | 1.21  | 0.75–1.97 | 0.436    | 1.26 | 0.67–2.37  | 0.468    | 0.88   | 0.31–2.50 | 0.805    |
| Higher than average                            | 1.12  | 0.84–1.49 | 0.455    | 0.78 | 0.34–1.80  | 0.556    | 1.60   | 0.82–3.13 | 0.165    |
| Smoking                                        |       |           |          |      |            |          |        |           |          |
| Yes                                            | 2.01  | 1.55–2.61 | <0.001   | 2.92 | 2.24–3.80  | <0.001   | 1.13   | 0.75–1.70 | 0.554    |
| Drinking                                       |       |           |          |      |            |          |        |           |          |
| Yes                                            | 1.22  | 0.91–1.63 | 0.176    | 1.00 | 0.79–1.26  | 0.998    | 1.62   | 0.75–3.48 | 0.220    |
| Physical active                                |       |           |          |      |            |          |        |           |          |
| Yes                                            | 1.17  | 0.58–2.35 | 0.656    | 1.51 | 0.45–5.08  | 0.507    | 1.12   | 0.73–1.72 | 0.600    |

|                    |      |           |        |      |           |        |      |           |       |
|--------------------|------|-----------|--------|------|-----------|--------|------|-----------|-------|
| Playing video game |      |           |        |      |           |        |      |           |       |
| Over 4 hours       | 0.84 | 0.57–1.23 | 0.370  | 0.84 | 0.35–2.01 | 0.700  | 0.81 | 0.63–1.03 | 0.089 |
| Bully Experience   |      |           |        |      |           |        |      |           |       |
| Moderate vs. None  | 2.26 | 1.45–3.53 | <0.001 | 2.25 | 1.96–2.58 | <0.001 | 2.54 | 1.05–6.12 | 0.038 |
| Severe vs. None    | 2.90 | 1.04–8.09 | 0.041  | 3.36 | 1.14–9.97 | 0.029  | 2.63 | 0.97–7.12 | 0.057 |
| Mental Problem     |      |           |        |      |           |        |      |           |       |
| Moderate vs. Light | 1.64 | 0.74–3.65 | 0.227  | 1.58 | 0.38–6.55 | 0.530  | 1.48 | 0.60–3.65 | 0.390 |
| Severe vs. Light   | 3.44 | 1.77–6.66 | <0.001 | 3.73 | 2.38–5.84 | <0.001 | 2.97 | 0.95–9.31 | 0.062 |
